# Supplementary material for: Zinc-dual-halide complexes suppressing polyhalide formation for rechargeable aqueous zinc–halogen batteries
Source: Royal Society of Chemistry journal article supplement (doi:10.1039/d3cc02893c), 2023-01-01
Supplement: d3cc02893c1.pdf [file d3cc02893c1.pdf]

Electronic Supplementary Information for

**Zinc-dual-halide complexes suppressing polyhalide formation for  
rechargeable aqueous zinc-halogen batteries**

Wanlong Wu,<sup>a</sup> Xiaoyu Yin,<sup>a</sup> Sibowang,<sup>a</sup> Quanwei Jiang,<sup>a</sup> Hua-Yu Shi<sup>a</sup> and Xiaoqi Sun<sup>a,b,\*</sup>

<sup>a</sup> Department of Chemistry, Northeastern University, Shenyang 110819, China

<sup>b</sup> National Frontiers Science Center for Industrial Intelligence and Systems Optimization, Northeastern University,  
Shenyang 110819, China

\*E-mail: sunxiaoqi@mail.neu.edu.cn

## Experimental Section

**Materials:** Graphite foil was purchased from SGL group (Germany). Zinc foil, N-methylpyrrolidone (NMP), polyvinylidene difluoride (PVDF) and Super P was obtained from Sinopharm Chemical Reagent. Other reagents were purchased from Sinopharm Chemical Reagent Co., Ltd.

**Preparation of cathode conductive medium:** The cathode conductive medium was prepared by mixing Super P and PVDF at a mass ratio of 9:1 in NMP. The slurry was casted onto graphite foil and dried at 80°C for 12 hours. The mass loading of Super P and PVDF was around 3 mg cm<sup>-2</sup>.

**Material characterizations:** Raman spectroscopy was conducted on BWS465-532S, B&W Tek Inc., USA with a 532 nm excitation laser. X-ray photoelectron spectroscopy (XPS) was carried out on KRATOS, Axis Ultra<sup>DLD</sup> with Al-K $\alpha$  radiation (UK) as the excitation source. The data was analyzed using CasaXPS software and calibrated by referencing the C 1s peak to 284.6 eV. The electrodes for ex-situ Raman and XPS measurements were cycled 10 times for stabilization and charged/discharged to the desired states. In the Raman spectra, X<sub>2</sub> and polyhalide show apparent signals whereas halide ions do not. The electrodes were thus not washed for Raman analysis to retain and detect the possible signals from polyhalide. In the XPS spectra, on the other hand, halides also exhibit apparent signals. In order to eliminate halides from electrolytes, the electrodes were washed for XPS analysis.

**Electrochemical measurements:** Swagelok® type cells were assembled with Super P/PVDF cathode, Zn anode, and aqueous zinc halide electrolytes (100  $\mu$ L). The areas of both electrodes were 1.13 cm<sup>2</sup>. Titanium rods were used as the current collectors. The current density and specific capacity were calculated based on the total mass of Super P and PVDF. Electrochemical impedance spectroscopy (EIS) measurements were carried out in the frequency range from 110 mHz to 100 kHz in three electrode cells with saturated calomel electrode (SCE) as the reference. The electrochemical measurements were performed on the Bio-logic VMP3 electrochemical system.

**Computational details:** Density functional theory (DFT) calculations were carried out with the Materials Studio 2019 software package. Geometrical optimizations were conducted at the Dmol3 basis set. Energy calculations were performed on the optimized structures.

## Supporting figures and tables

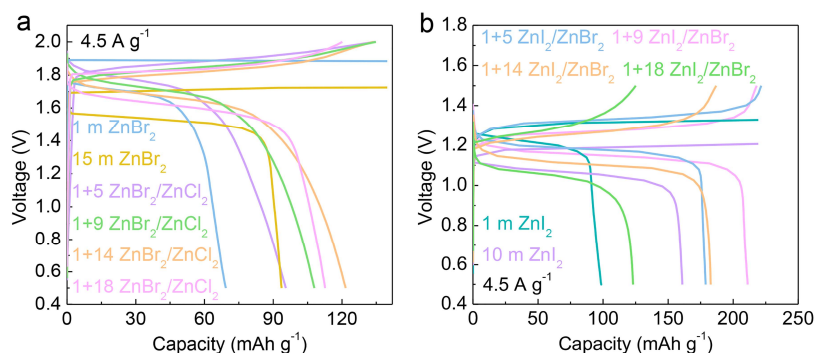

**Fig. S1.** Charge/discharge curves of a) Zn-Br<sub>2</sub> and b) Zn-I<sub>2</sub> cells at 4.5 A g<sup>-1</sup> with different aqueous electrolytes. For the Zn-Br<sub>2</sub> cells, the coulombic efficiency increases with ZnCl<sub>2</sub> concentration, i.e., 49%, 67%, 71%, 80%, 91% and 94% obtained in the electrolytes of 1 m ZnBr<sub>2</sub>, 15 m ZnBr<sub>2</sub>, 1+5 ZnBr<sub>2</sub>/ZnCl<sub>2</sub>, 1+9 ZnBr<sub>2</sub>/ZnCl<sub>2</sub>, 1+14 ZnBr<sub>2</sub>/ZnCl<sub>2</sub> and 1+18 ZnBr<sub>2</sub>/ZnCl<sub>2</sub>, respectively. Nevertheless, the capacity and overpotential in the 1+18 ZnBr<sub>2</sub>/ZnCl<sub>2</sub> electrolyte are poorer than in 1+14 ZnBr<sub>2</sub>/ZnCl<sub>2</sub>. Similar trends are observed in the Zn-I<sub>2</sub> cells as well. By overall considerations of coulombic efficiency, capacity and overpotential, the 1+14 ZnBr<sub>2</sub>/ZnCl<sub>2</sub> and 1+9 ZnI<sub>2</sub>/ZnBr<sub>2</sub> appear to be optimal concentrations and are applied.

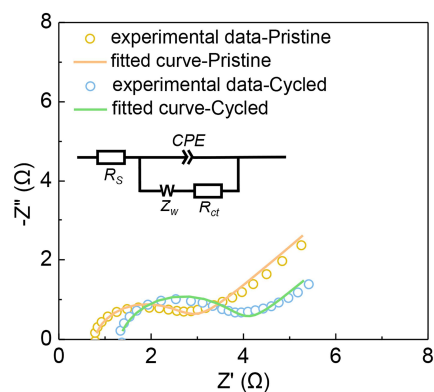

**Fig. S2.** The Nyquist plots and the fitted curves (inset showing the equivalent circuit) in the ZnBr<sub>2</sub>/ZnCl<sub>2</sub> electrolyte.

**Table S1.** The fitted  $R_s$  and  $R_{ct}$  values in the ZnBr<sub>2</sub>/ZnCl<sub>2</sub> electrolyte.

| States   | $R_s$ (ohm) | $R_{ct}$ (ohm) |
|----------|-------------|----------------|
| Pristine | 0.72        | 1.40           |
| Cycled   | 0.96        | 1.92           |

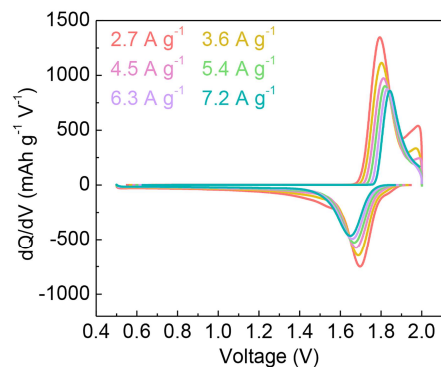

Fig. S3. The differential capacity curves at different current densities of Zn-Br<sub>2</sub> cells with the ZnBr<sub>2</sub>/ZnCl<sub>2</sub> electrolyte.

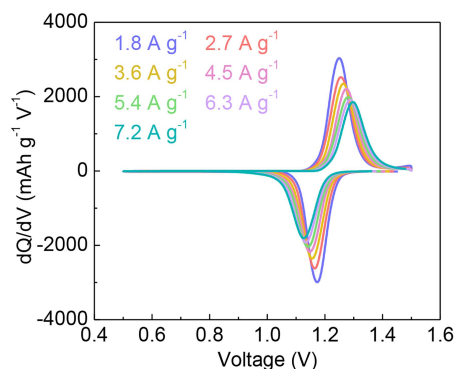

Fig. S4. The differential capacity curves at different current densities of Zn-I<sub>2</sub> cells with the ZnI<sub>2</sub>/ZnBr<sub>2</sub> electrolyte.

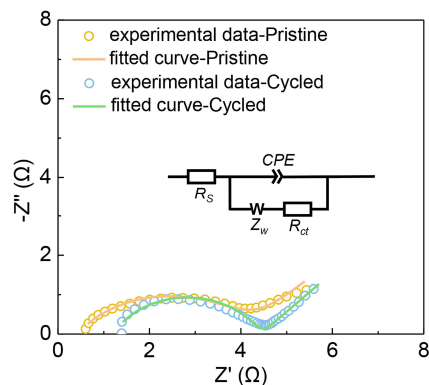

Fig. S5. The Nyquist plots and fitted curves (inset showing the equivalent circuit) in the ZnI<sub>2</sub>/ZnBr<sub>2</sub> electrolyte.

Table S2. The fitted  $R_s$  and  $R_{ct}$  values in the ZnI<sub>2</sub>/ZnBr<sub>2</sub> electrolyte.

| States   | $R_s$ (ohm) | $R_{ct}$ (ohm) |
|----------|-------------|----------------|
| Pristine | 0.39        | 4.46           |
| Cycled   | 1.00        | 3.67           |

**Table S3.** Electrochemical performance comparison of the zinc-bromine battery with previous publications.

| Cathode                                                        | Capacity                                           | Cycling performance                                    | CE           | Ref.             |
|----------------------------------------------------------------|----------------------------------------------------|--------------------------------------------------------|--------------|------------------|
| AC@TBABr                                                       | 98 mAh g <sup>-1</sup> /1 A g <sup>-1</sup>        | Stable/2000/1 A g <sup>-1</sup>                        | 98%          | [1]              |
| Carbon Foam                                                    | 36.8 mAh/20 mA                                     | Stable/1000/20 mA                                      | 91%          | [2]              |
| Br <sub>2</sub> -Ti <sub>3</sub> C <sub>2</sub> T <sub>x</sub> | 143 mAh g <sup>-1</sup> /2 A g <sup>-1</sup>       | 116 mAh g <sup>-1</sup> /2000/2 A g <sup>-1</sup>      | 97%          | [3]              |
| NGF-700                                                        | 16 mAh/20 mA                                       | Stable/1000/20 mA                                      | 85%          | [4]              |
| SP-PBH                                                         | 1.85 mAh cm <sup>-2</sup> /8 mA cm <sup>-2</sup>   | Stable/1200/8 mA cm <sup>-2</sup>                      | 92%          | [5]              |
| <b>Super P</b>                                                 | <b>109 mAh g<sup>-1</sup>/5.4 A g<sup>-1</sup></b> | <b>90 mAh g<sup>-1</sup>/1200/5.4 A g<sup>-1</sup></b> | <b>92.7%</b> | <b>This work</b> |

**Table S4.** Electrochemical performance comparison of the zinc-iodine battery with previous publications.

| Cathode                                                                  | Capacity                                           | Cycling performance                                     | CE         | Ref.             |
|--------------------------------------------------------------------------|----------------------------------------------------|---------------------------------------------------------|------------|------------------|
| I <sub>2</sub> @C                                                        | 210 mAh g <sup>-1</sup> /0.1 A g <sup>-1</sup>     | 170 mAh g <sup>-1</sup> /50/0.1 A g <sup>-1</sup>       | 91.3%      | [6]              |
| NCCs/I <sub>2</sub>                                                      | 131 mAh g <sup>-1</sup> /5 A g <sup>-1</sup>       | 113 mAh g <sup>-1</sup> /3500/5 A g <sup>-1</sup>       | ~100%      | [7]              |
| Ketjen black                                                             | 102.6 mAh g <sup>-1</sup> /1.28 A g <sup>-1</sup>  | 85.1 mAh g <sup>-1</sup> /6000/1.92 A g <sup>-1</sup>   | 99.65%     | [8]              |
| I <sub>2</sub> @ACF                                                      | 143 mAh g <sup>-1</sup> /2C                        | 128.7 mAh g <sup>-1</sup> /3000/2C                      | ~100%      | [9]              |
| I <sub>2</sub> -C                                                        | 300 mAh g <sup>-1</sup> /2 mA cm <sup>-2</sup>     | 275 mAh g <sup>-1</sup> /200/2 mA cm <sup>-2</sup>      | 99%        | [10]             |
| I <sub>2</sub> -Co[Co <sub>x</sub> Fe <sub>1-x</sub> (CN) <sub>6</sub> ] | 236.8 mAh g <sup>-1</sup> /0.1 A g <sup>-1</sup>   | 165.6 mAh g <sup>-1</sup> /2000/4 A g <sup>-1</sup>     | ~100%      | [11]             |
| Carbon cloth                                                             | 210 mAh g <sup>-1</sup> /1C                        | 198 mAh g <sup>-1</sup> /500/1C                         | 98.5%      | [12]             |
| I <sub>2</sub> /OSTC                                                     | 185 mAh g <sup>-1</sup> /1 A g <sup>-1</sup>       | 157.3 mAh g <sup>-1</sup> /10000/1 A g <sup>-1</sup>    | ~100%      | [13]             |
| NiSAs-HPC/I <sub>2</sub>                                                 | 188 mAh g <sup>-1</sup> /5C                        | 179 mAh g <sup>-1</sup> /1000/5C                        | ~100%      | [14]             |
| Carbon fiber paper                                                       | 4.1 mAh cm <sup>-2</sup> /0.3 mA cm <sup>-2</sup>  | stable/500/0.3 mA cm <sup>-2</sup>                      | 90%        | [15]             |
| <b>Super P</b>                                                           | <b>204 mAh g<sup>-1</sup>/5.4 A g<sup>-1</sup></b> | <b>198 mAh g<sup>-1</sup>/2800/5.4 A g<sup>-1</sup></b> | <b>98%</b> | <b>This work</b> |

## References

1. B. Evanko, S. J. Yoo, J. Lipton, S.-E. Chun, M. Moskovits, X. Ji, S. W. Boettcher and G. D. Stucky, *Energy Environ. Sci.*, 2018, **11**, 2865-2875.
2. S. Biswas, A. Senju, R. Mohr, T. Hodson, N. Karthikeyan, K. W. Knehr, A. G. Hsieh, X. Yang, B. E. Koel and D. A. Steingart, *Energy Environ. Sci.*, 2017, **10**, 114-120.
3. X. Li, N. Li, Z. Huang, Z. Chen, Y. Zhao, G. Liang, Q. Yang, M. Li, Q. Huang, B. Dong, J. Fan and C. Zhi, *ACS Nano*, 2021, **15**, 1718-1726.
4. J. H. Lee, Y. Byun, G. H. Jeong, C. Choi, J. Kwen, R. Kim, I. H. Kim, S. O. Kim and H. T. Kim, *Adv. Mater.*, 2019, **31**, 1904524.
5. W. Wu, S. Xu, Z. Lin, L. Lin, R. He and X. Sun, *Energy Storage Mater.*, 2022, **49**, 11-18.
6. W. Li, K. Wang and K. Jiang, *J. Mater. Chem. A*, 2020, **8**, 3785.
7. W. Liu, P. Liu, Y. Lyu, J. Wen, R. Hao, J. Zheng, K. Liu, Y. J. Li and S. Wang, *ACS Appl. Mater. Interfaces*, 2022, **14**, 8955-8962.
8. H. Yang, Y. Qiao, Z. Chang, H. Deng, P. He and H. Zhou, *Adv. Mater.*, 2020, **32**, 2004240.
9. H. Pan, B. Li, D. Mei, Z. Nie, Y. Shao, G. Li, X. S. Li, K. S. Han, K. T. Mueller and V. Sprenkle, *ACS Energy Lett.*, 2017, **2**, 2674-2680.
10. Y. Li, L. Liu, H. Li, F. Cheng and J. Chem, *Chem. Commun.*, 2018, **54**, 6792-6795.
11. L. Ma, Y. Ying, S. Chen, Z. Huang, X. Li, H. Huang and C. Zhi, *Angew. Chem. Int. Ed.*, 2021, **60**, 3791-3798.
12. K. K. Sonigara, J. Zhao, H. K. Machhi and G. Cui, *Adv. Energy Mater.*, 2020, **10**, 2001997.
13. M. Chen, W. Zhu, H. Guo, Z. Tian, L. Zhang, J. Wang, T. Liu, F. Lai and J. Huang, *Energy Storage Mater.*, 2023, **59**, 102760.
14. L. Ma, G. Zhu, Z. Wang, A. Zhu, K. Wu, B. Peng, J. Xu, D. Wang and Z. Jin, *Nano Lett.*, 2023, **23**, 5272-5280.
15. J. J. Hong, L. Zhu, C. Chen, L. Tang, H. Jiang, B. Jin, T. C. Gallagher, Q. Guo, C. Fang and X. Ji, *Angew. Chem. Int. Ed.*, 2019, **58**, 15910-15915.
